# Supplementary material
Source: PubMed Central journal article supplement (PMC10265586)

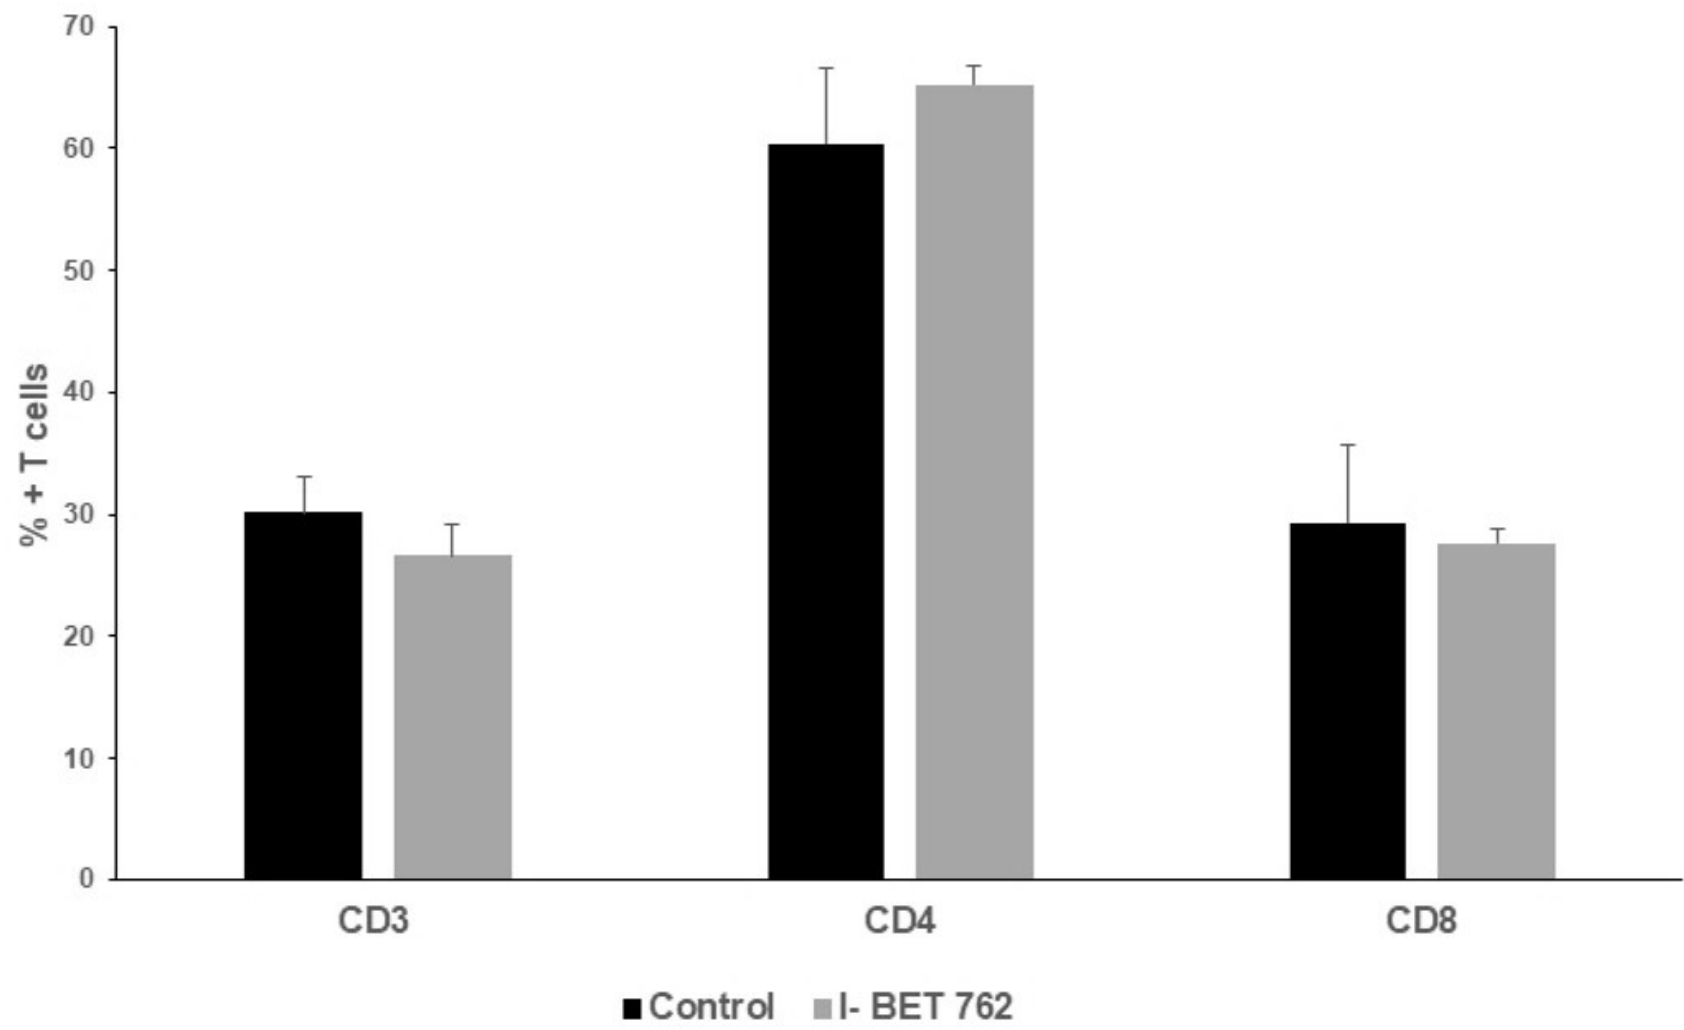

Supplement: NIHMS928425-supplement-10.pdf [file NIHMS928425-supplement-10.pdf]

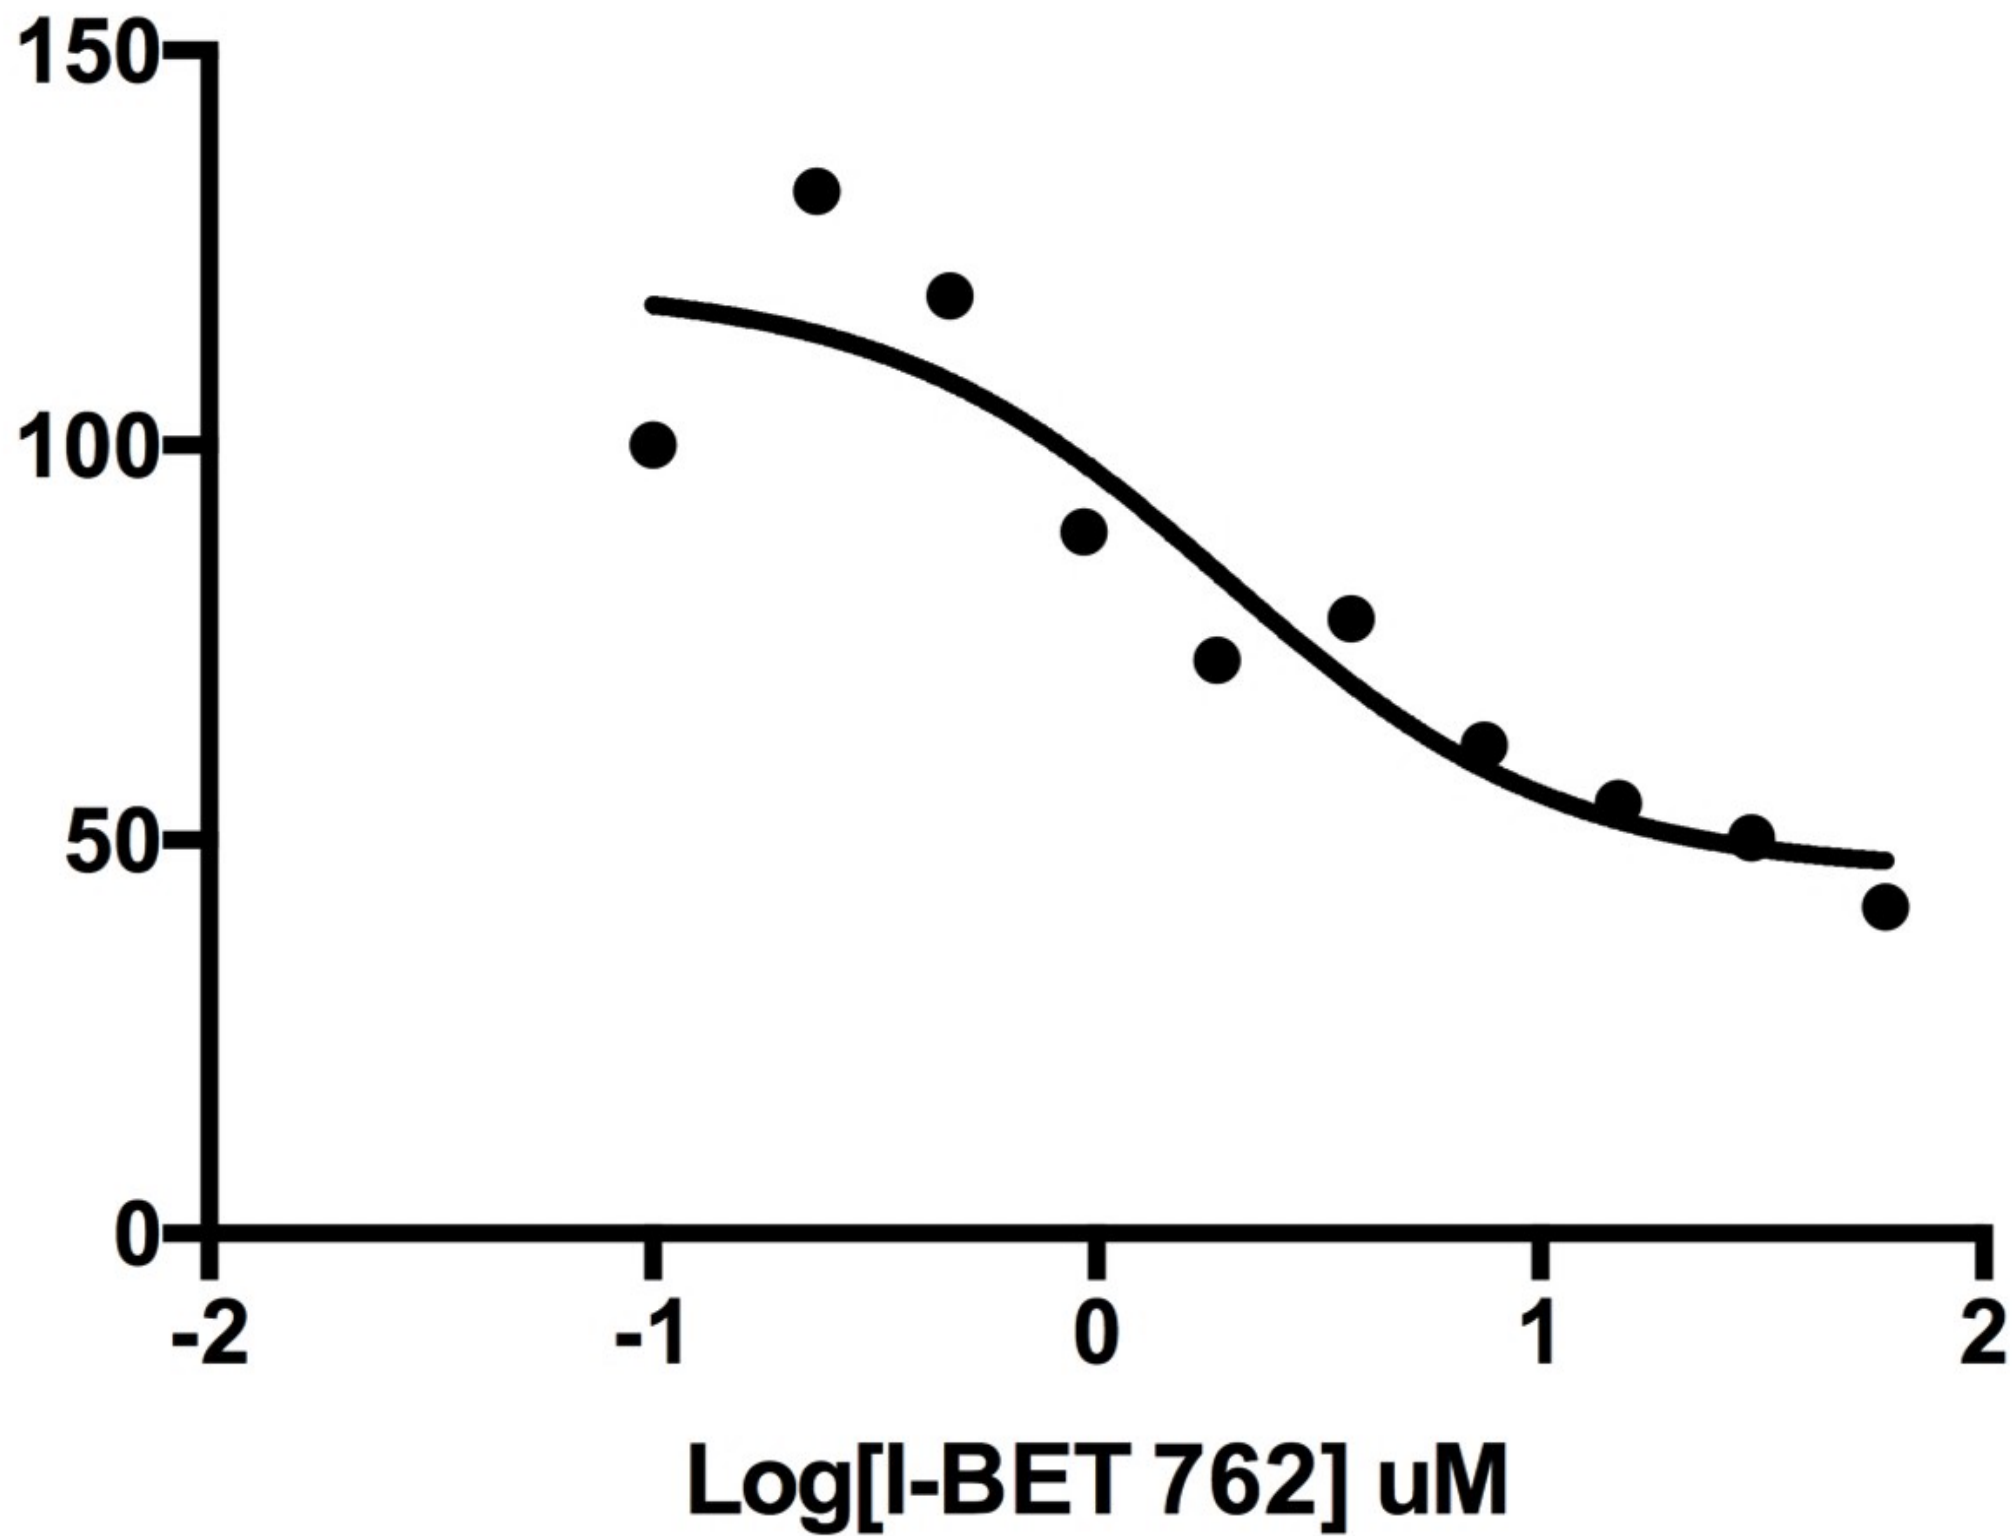

Supplement: NIHMS928425-supplement-2.pdf [file NIHMS928425-supplement-2.pdf]

## 48h treatment

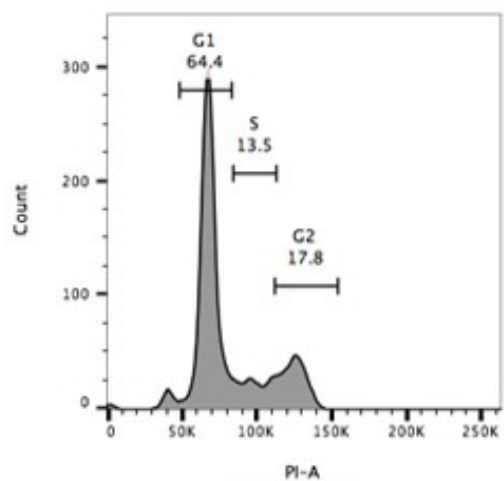

Control

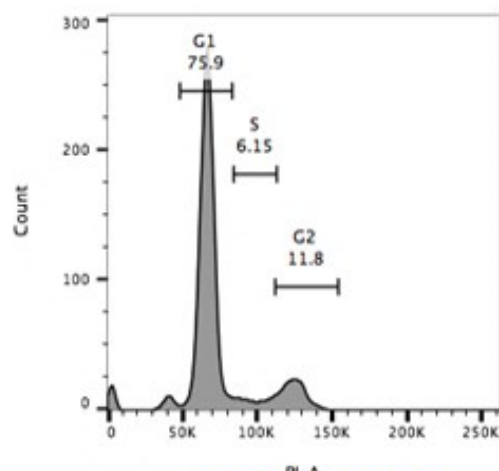

I-BET 762 1uM

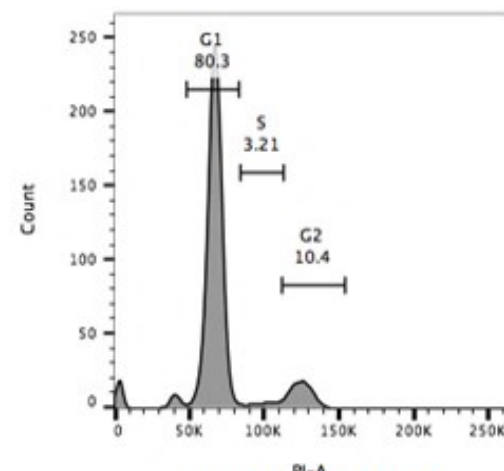

I-BET 762 3uM

## 72h treatment

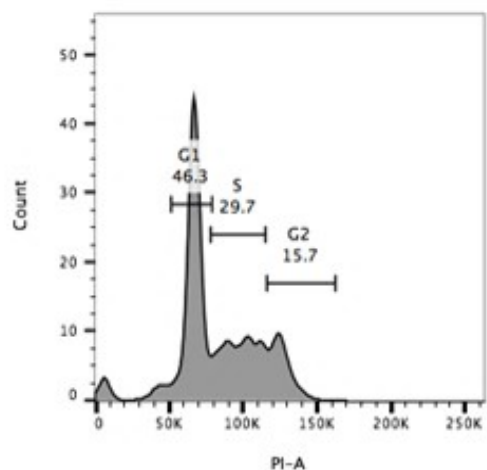

Control

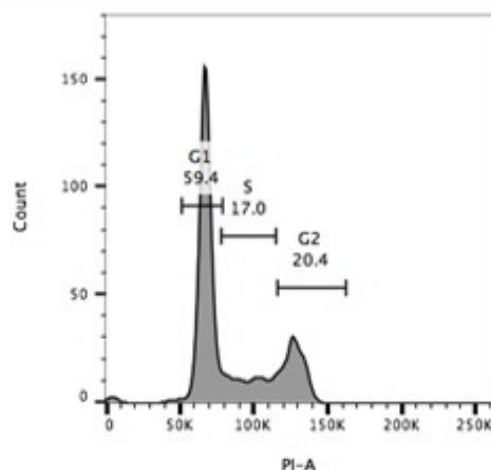

I-BET 762 1uM

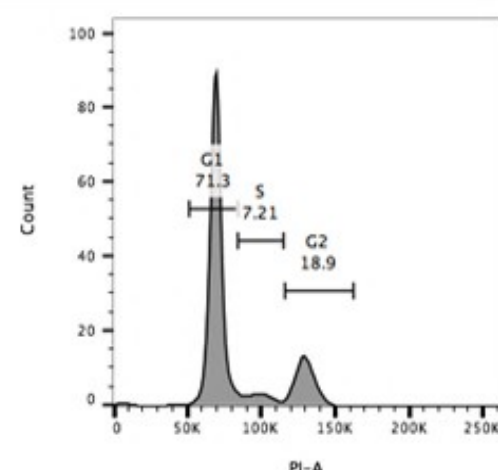

I-BET 762 3uM

Supplement: NIHMS928425-supplement-3.pdf [file NIHMS928425-supplement-3.pdf]

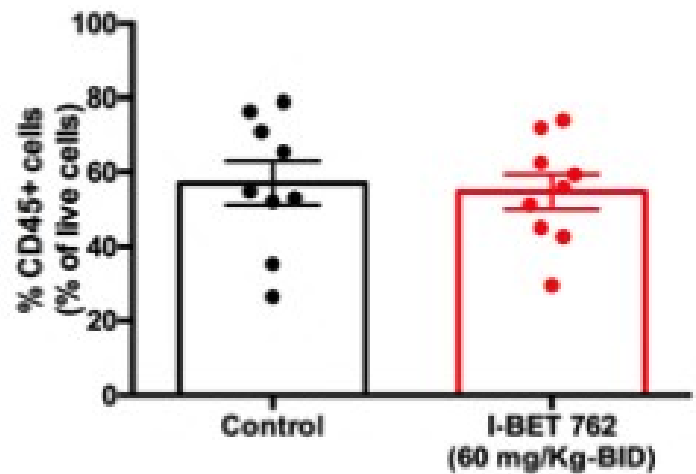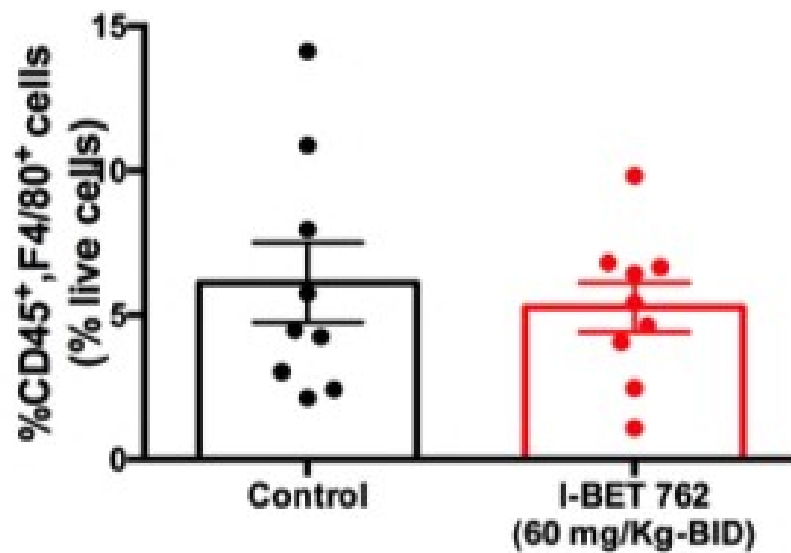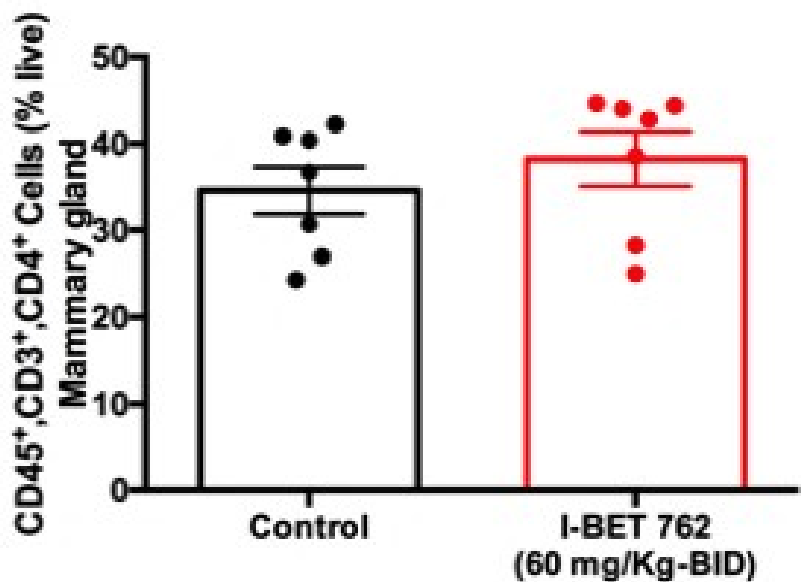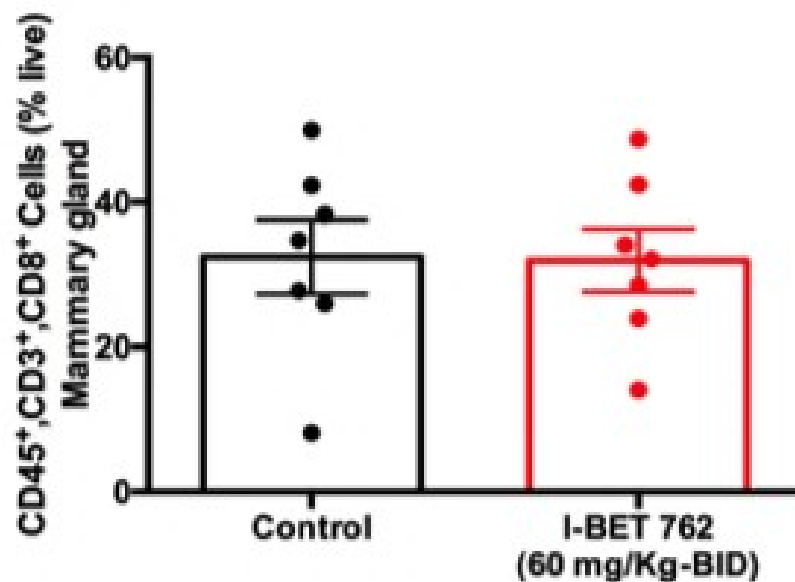

Supplement: NIHMS928425-supplement-4.pdf [file NIHMS928425-supplement-4.pdf]

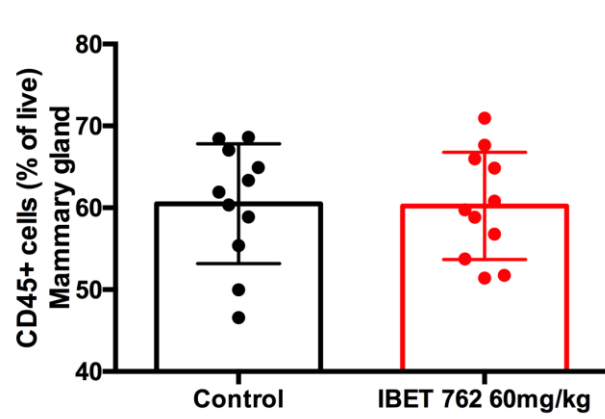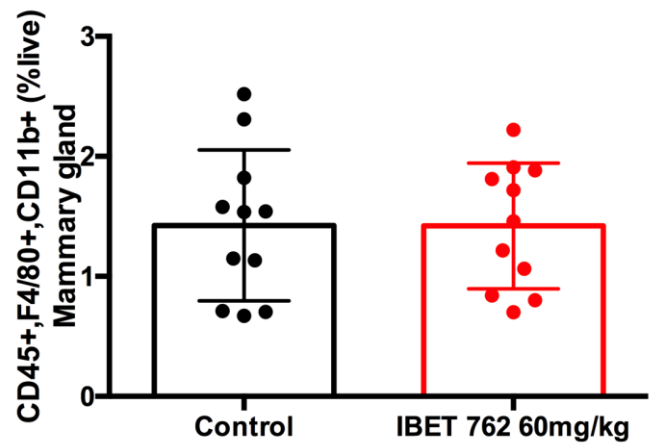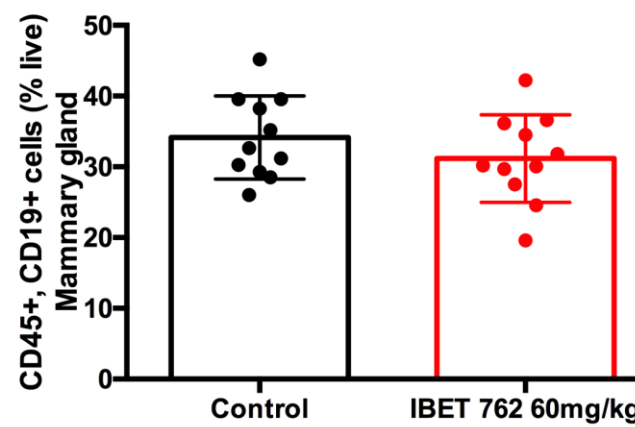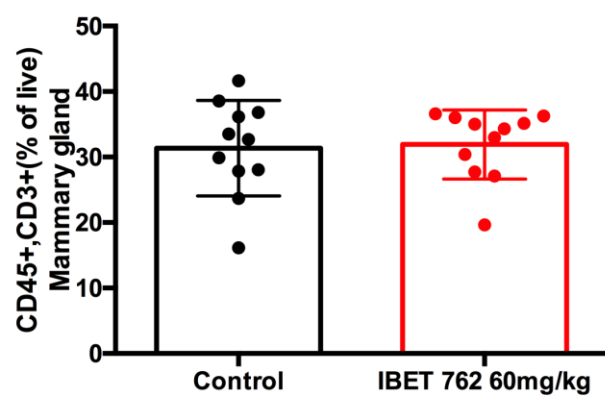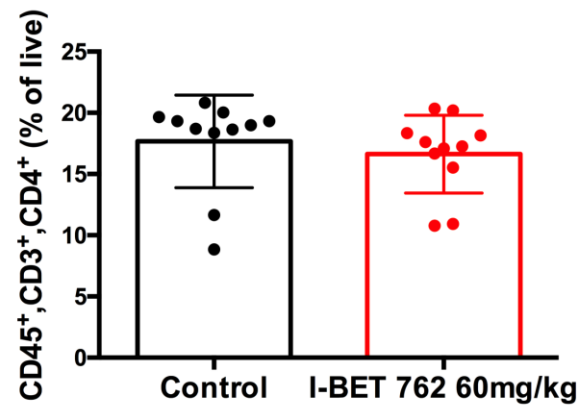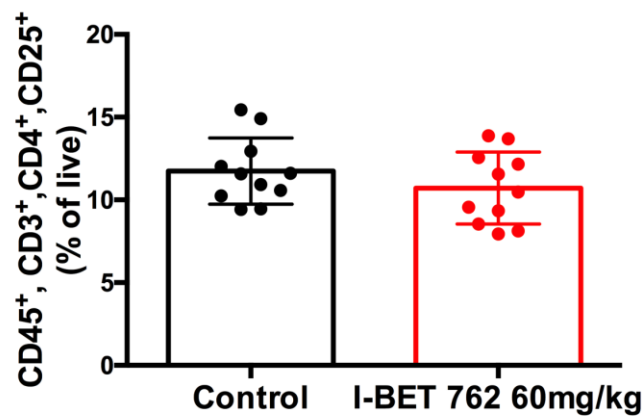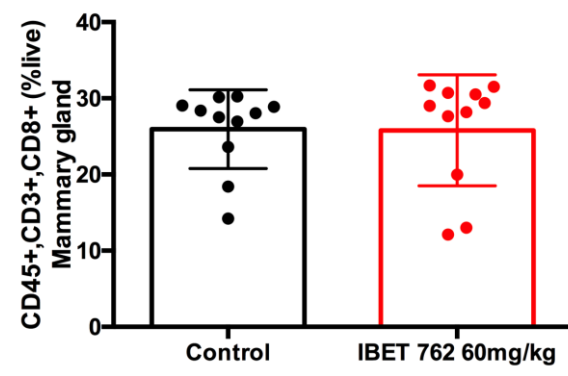

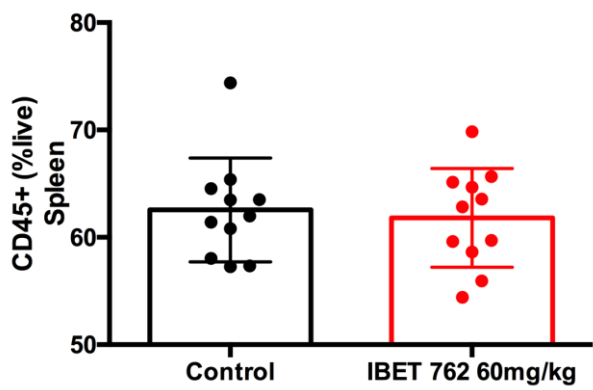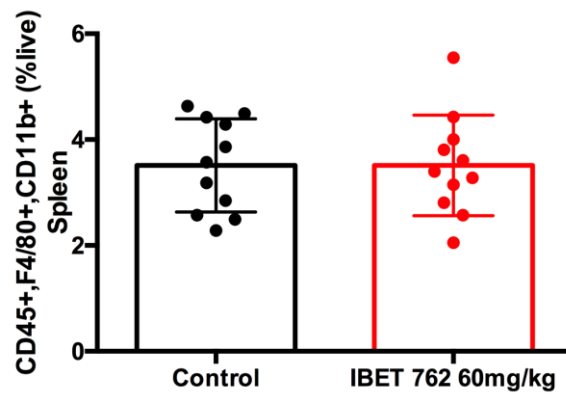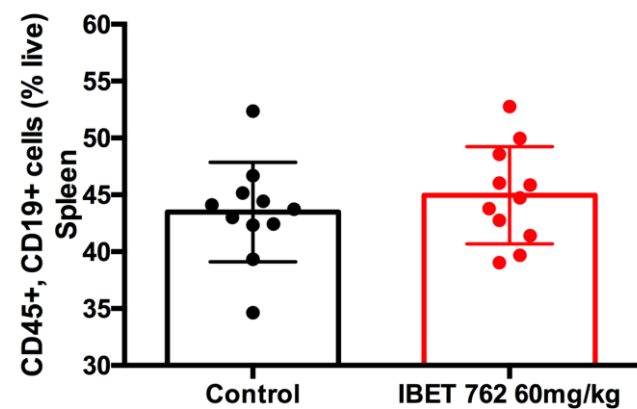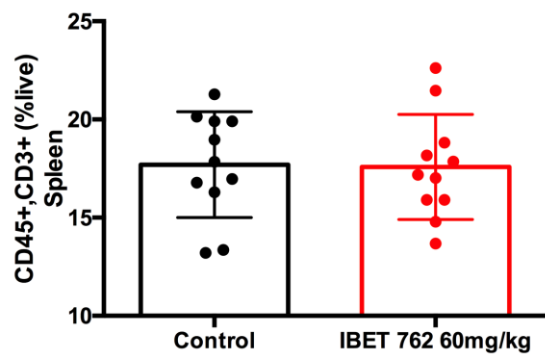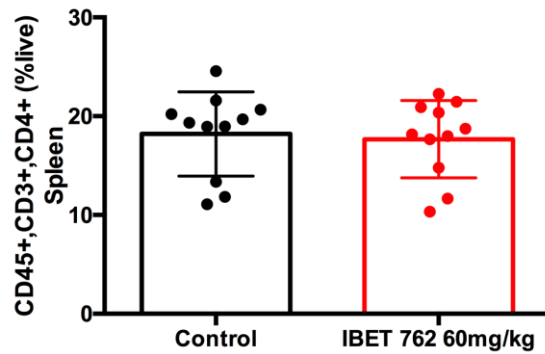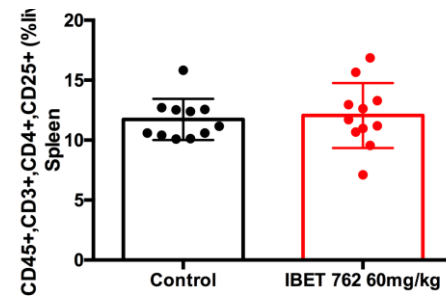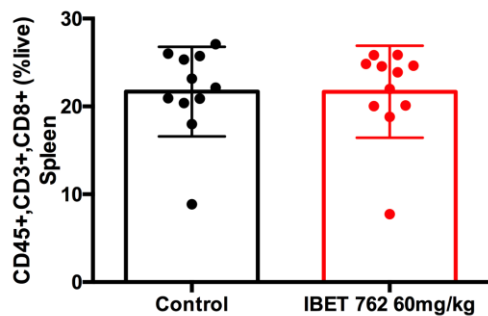

Supplement: NIHMS928425-supplement-5.pdf [file NIHMS928425-supplement-5.pdf]

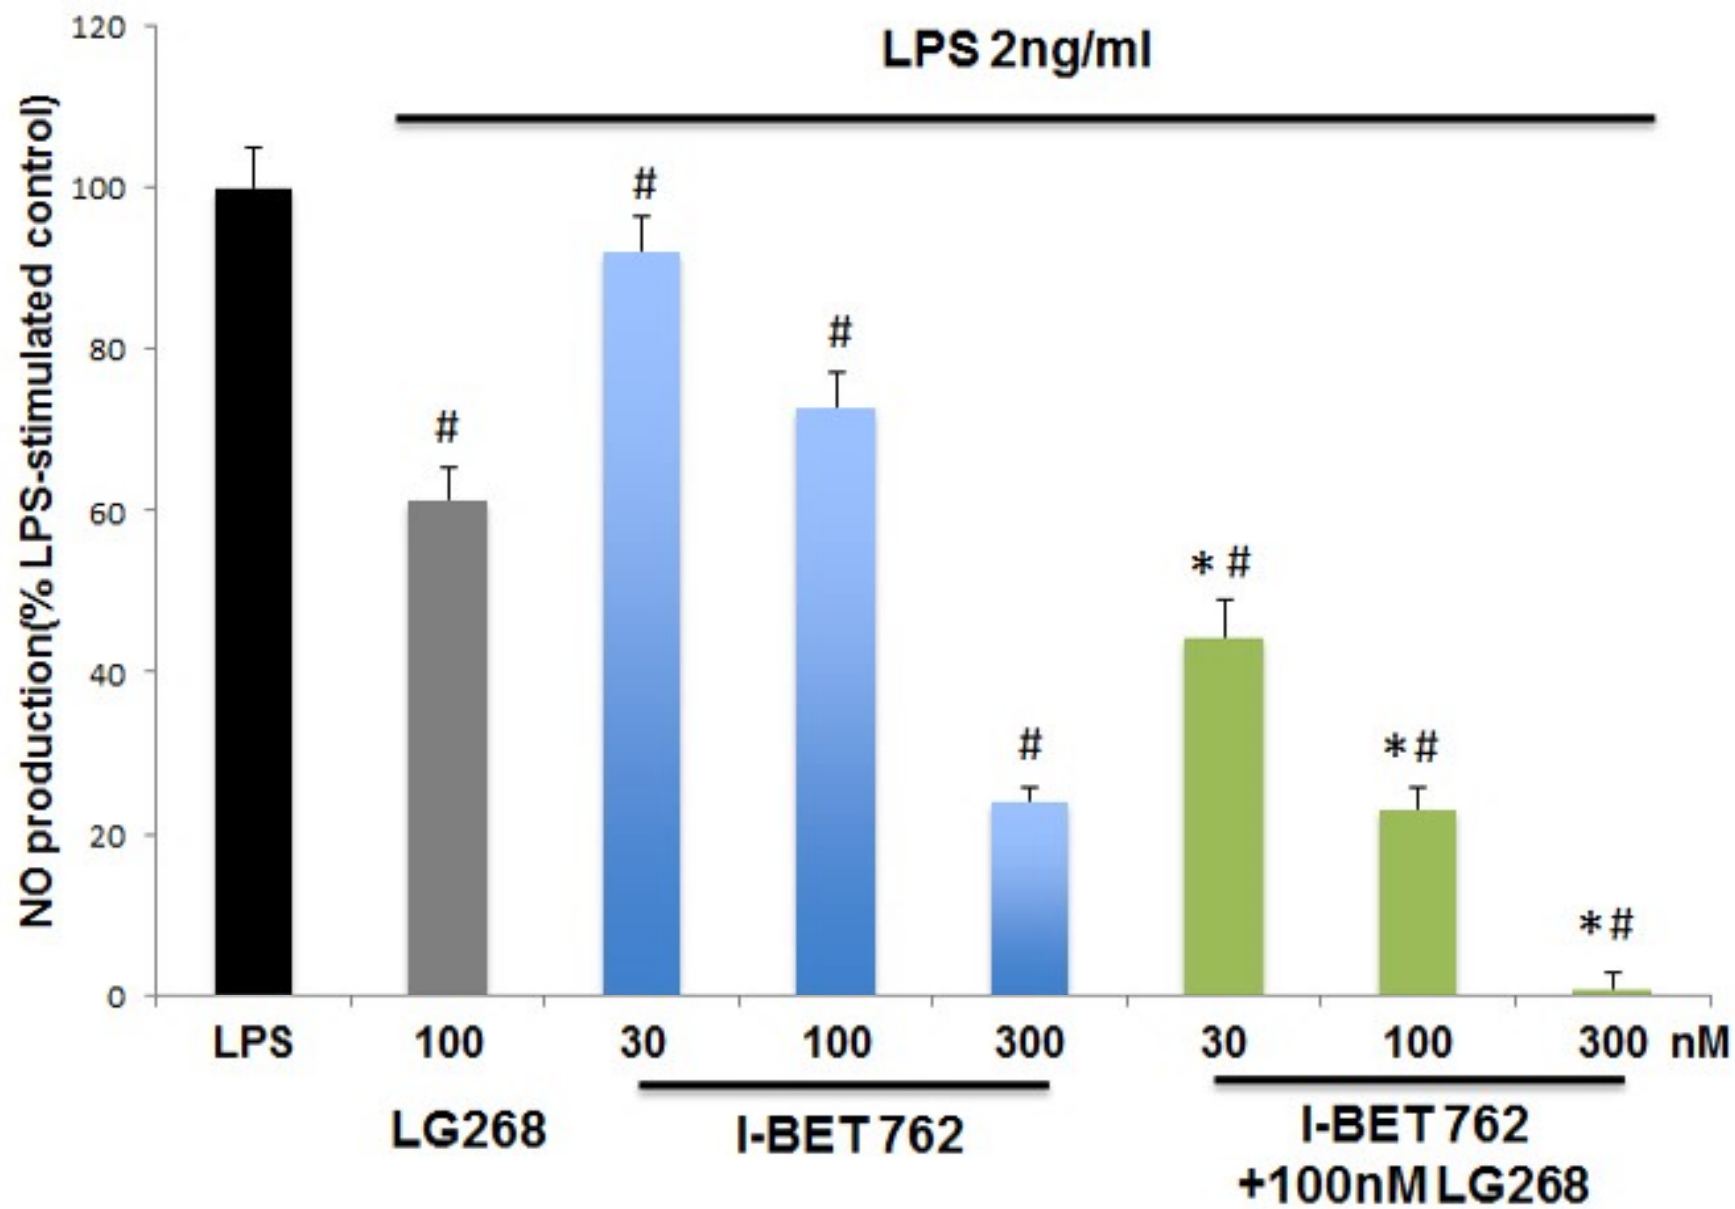

Supplement: NIHMS928425-supplement-6.pdf [file NIHMS928425-supplement-6.pdf]

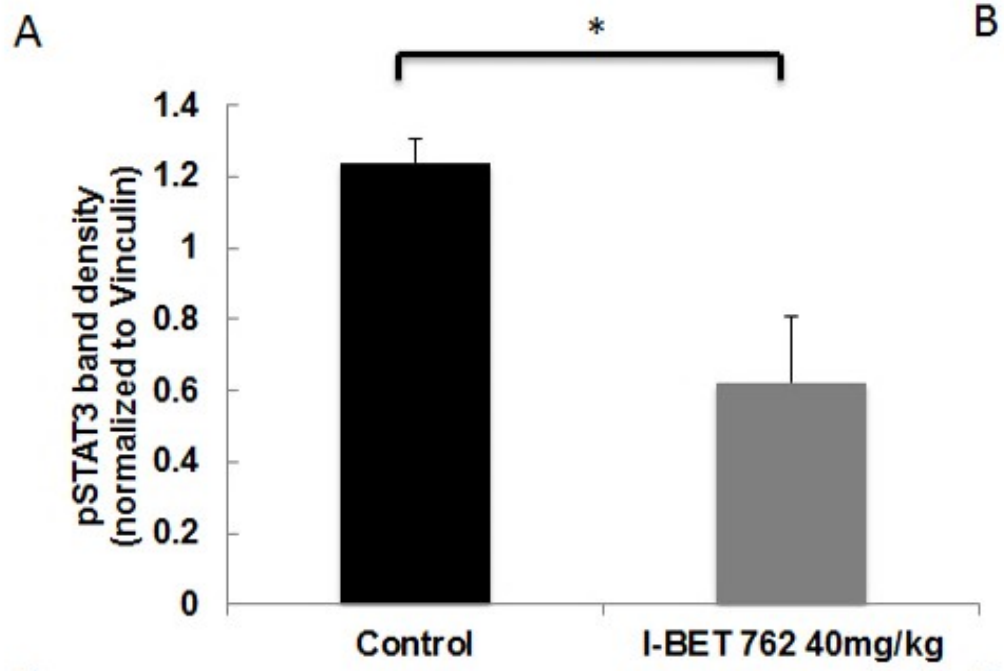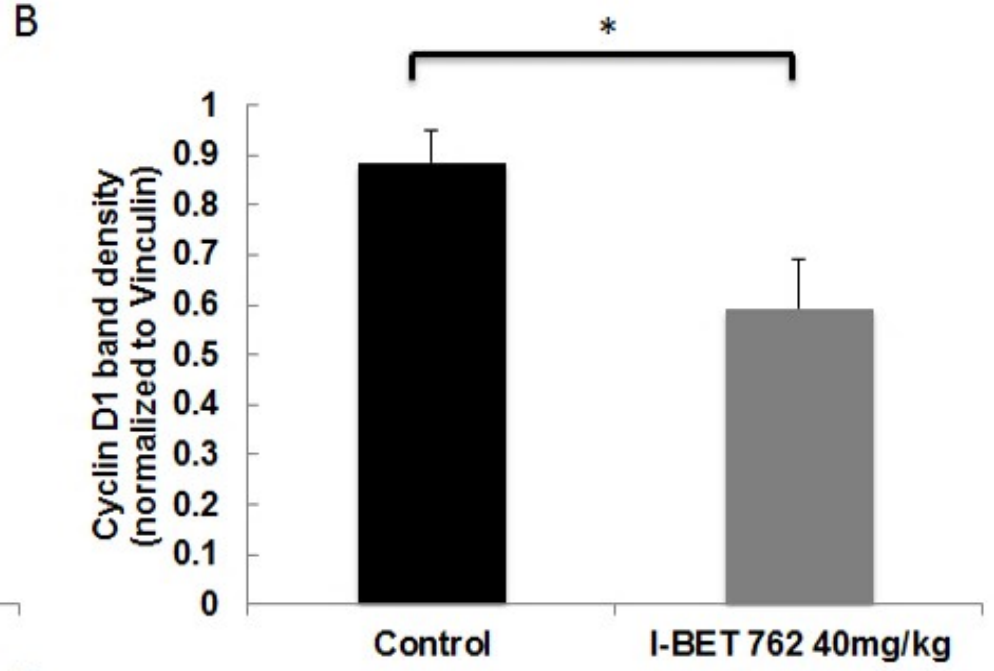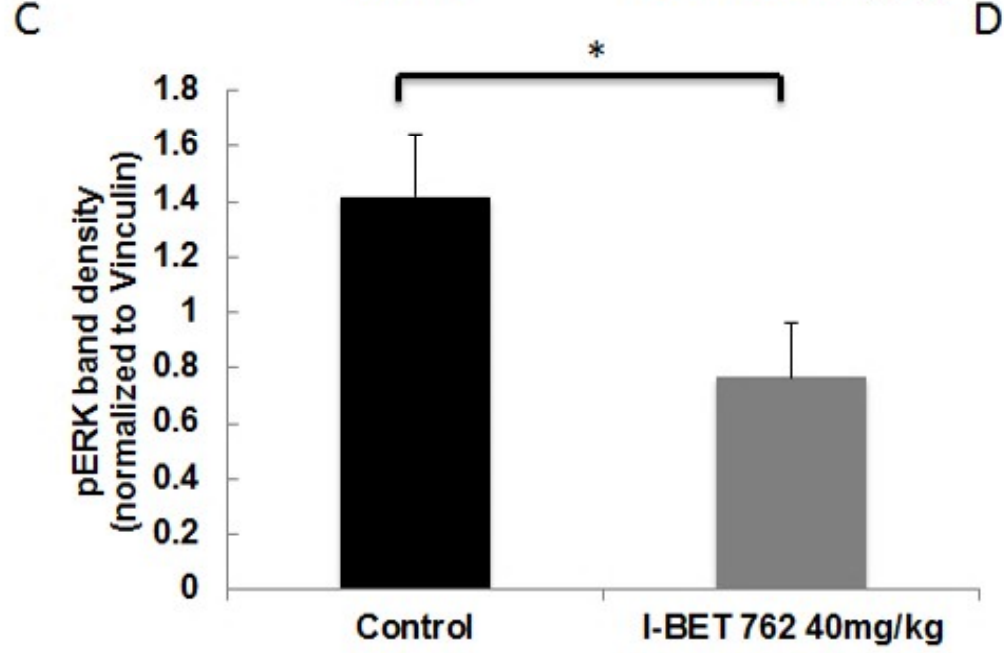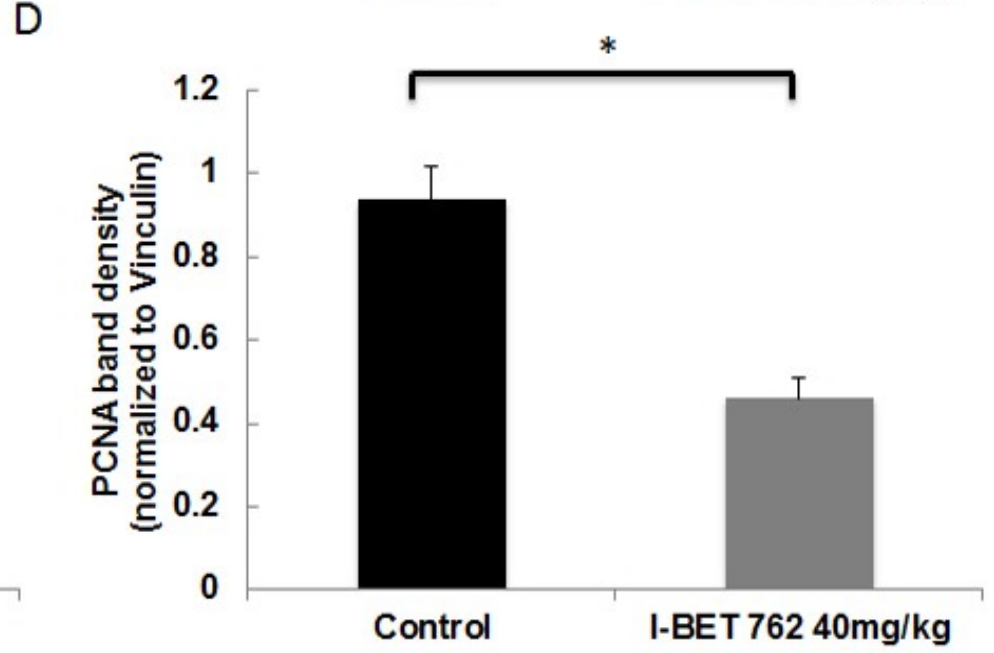

Supplement: NIHMS928425-supplement-7.pdf [file NIHMS928425-supplement-7.pdf]

control

I-BET 762 60mg/kg

C-Myc

Vinculin

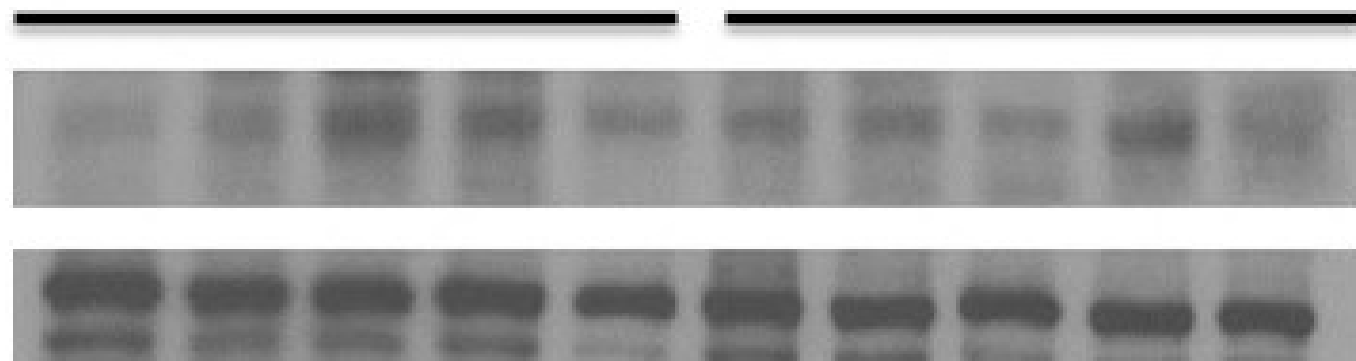

A/J

Control

IBET 40mg/kg

c-Myc

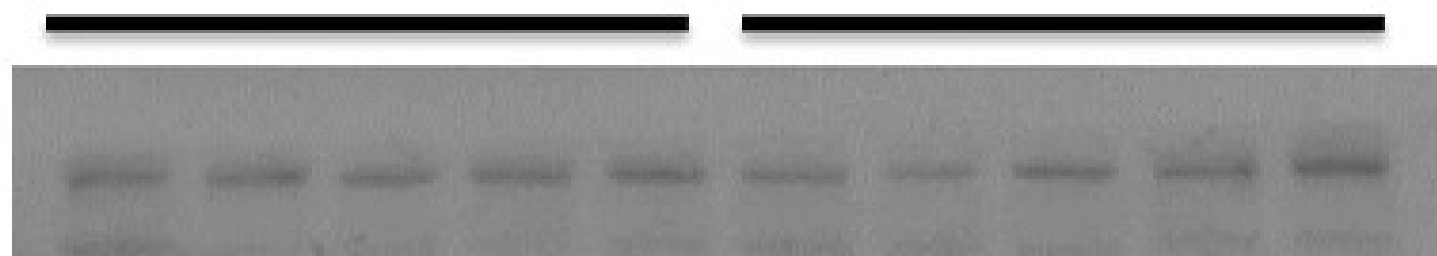

Supplement: NIHMS928425-supplement-8.pdf [file NIHMS928425-supplement-8.pdf]

A

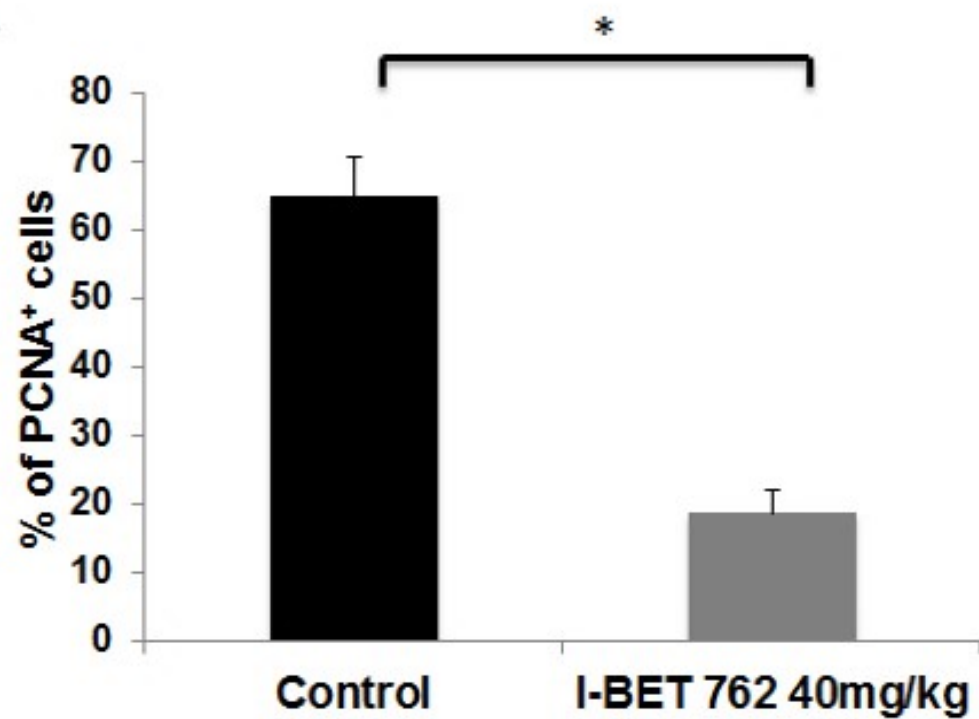

B

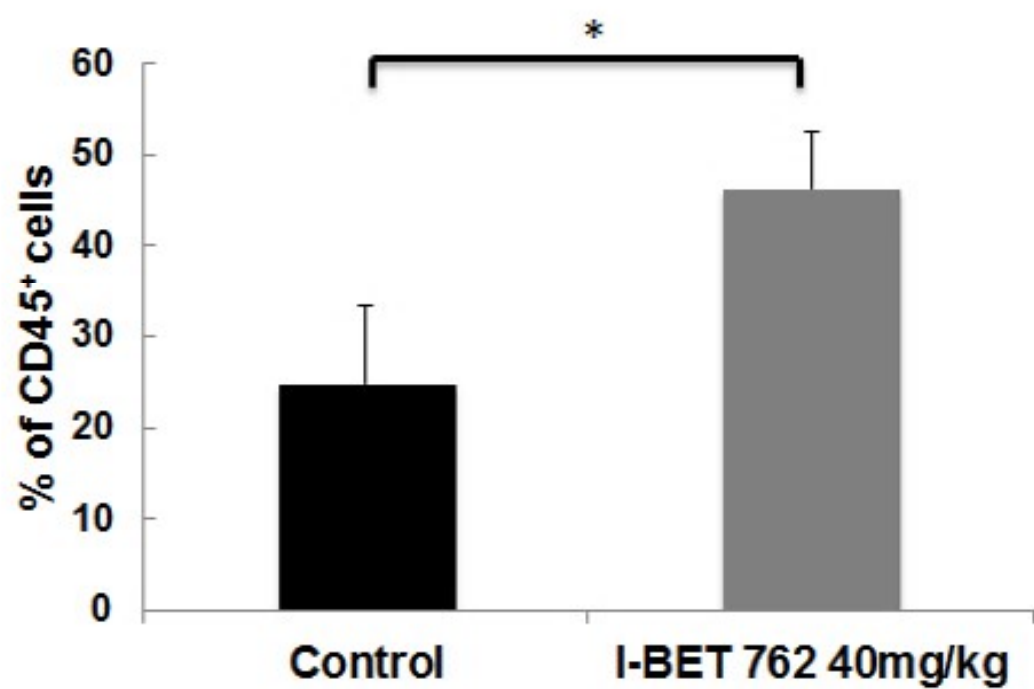

C

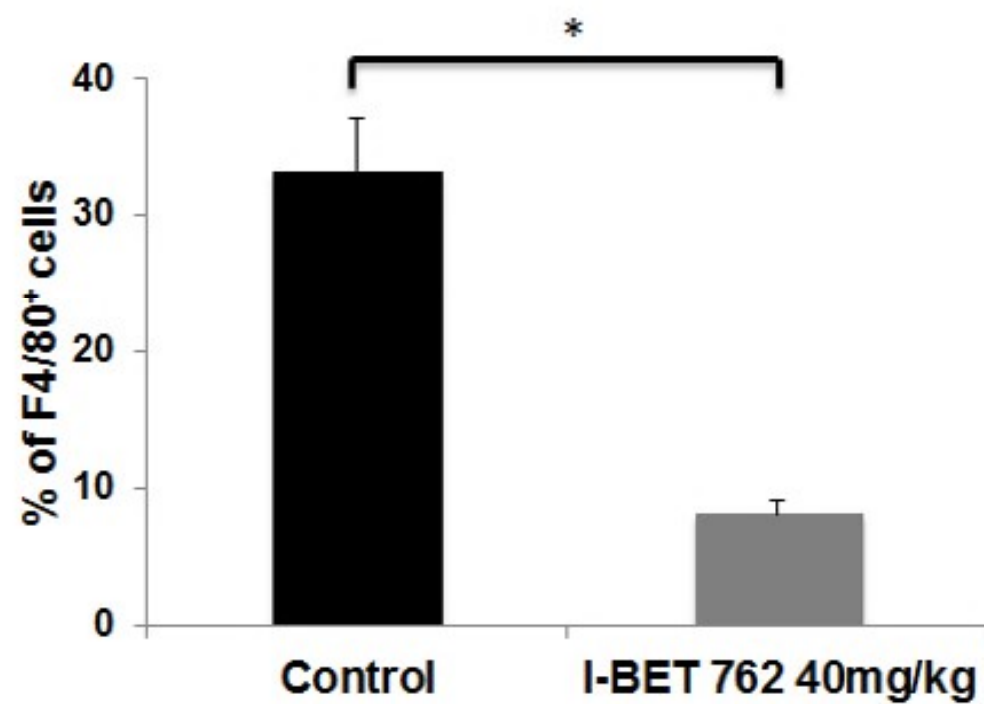

Supplement: NIHMS928425-supplement-9.pdf [file NIHMS928425-supplement-9.pdf]
